# Supplementary material for: Liquid BIOpsy for MiNimal RESidual DiSease Detection in Head and Neck Squamous Cell Carcinoma (LIONESS)—a personalised circulating tumour DNA analysis in head and neck squamous cell carcinoma
Source: PubMed Central journal article supplement (PMC9023460; doi:10.1038/s41416-022-01716-7), 2022-02-07

# Patient 15

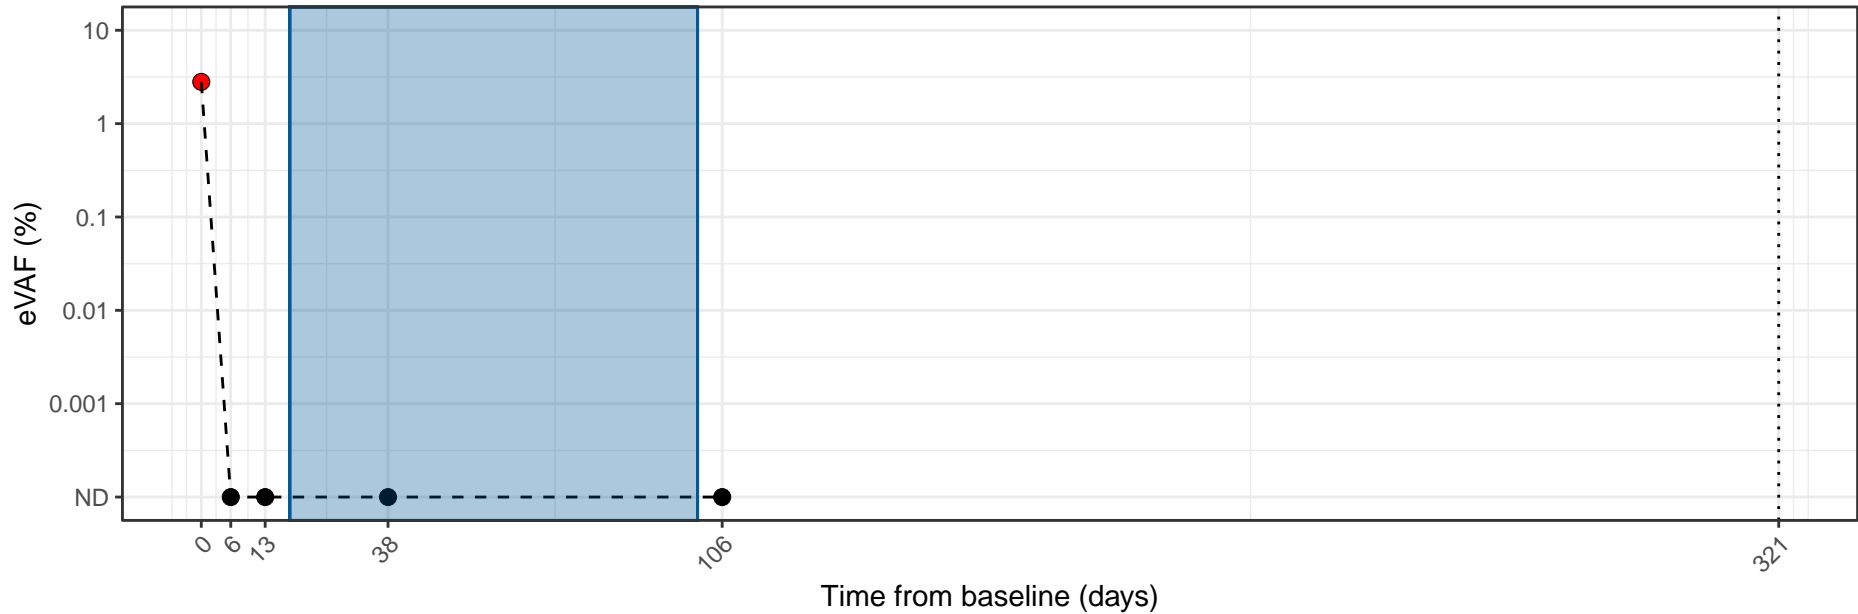

Patient 2

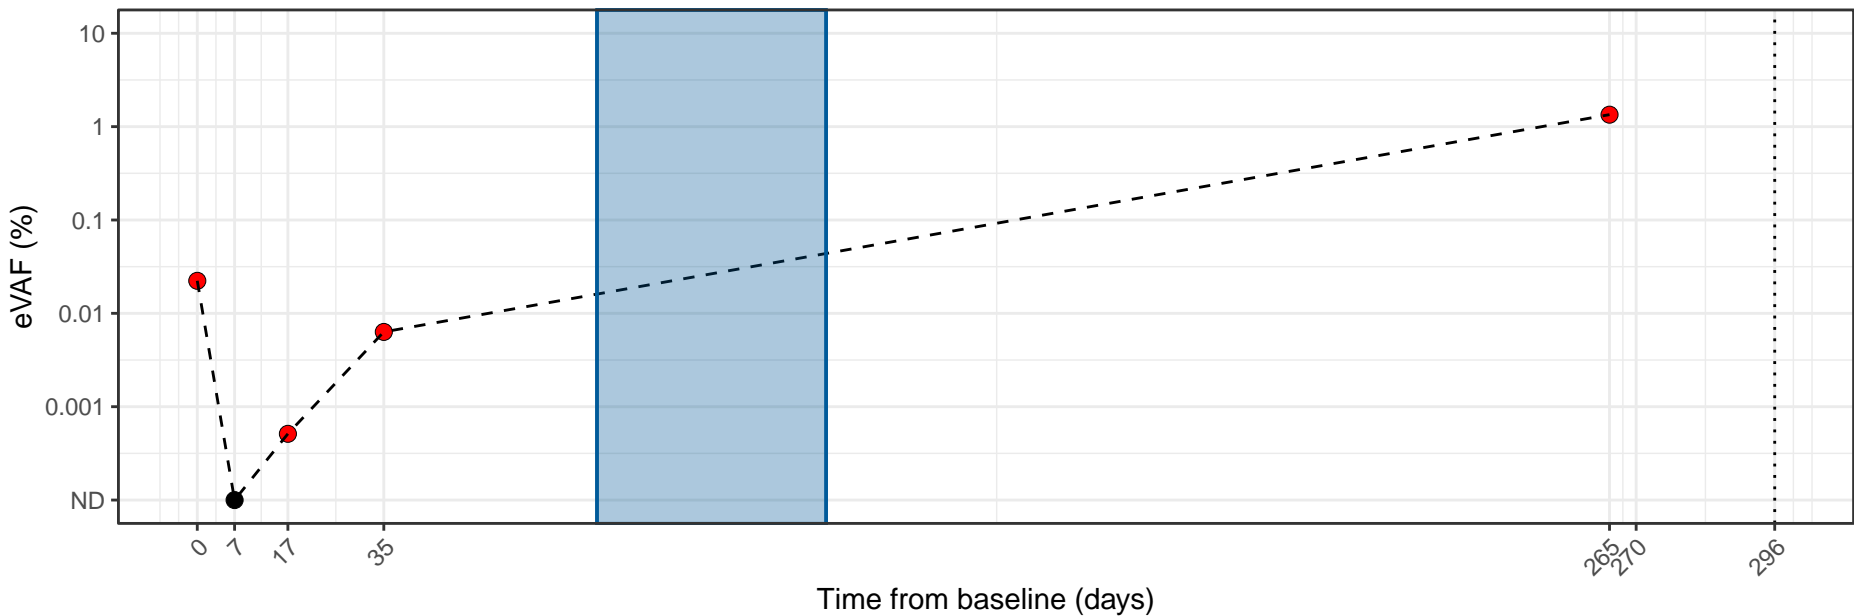

Patient 4

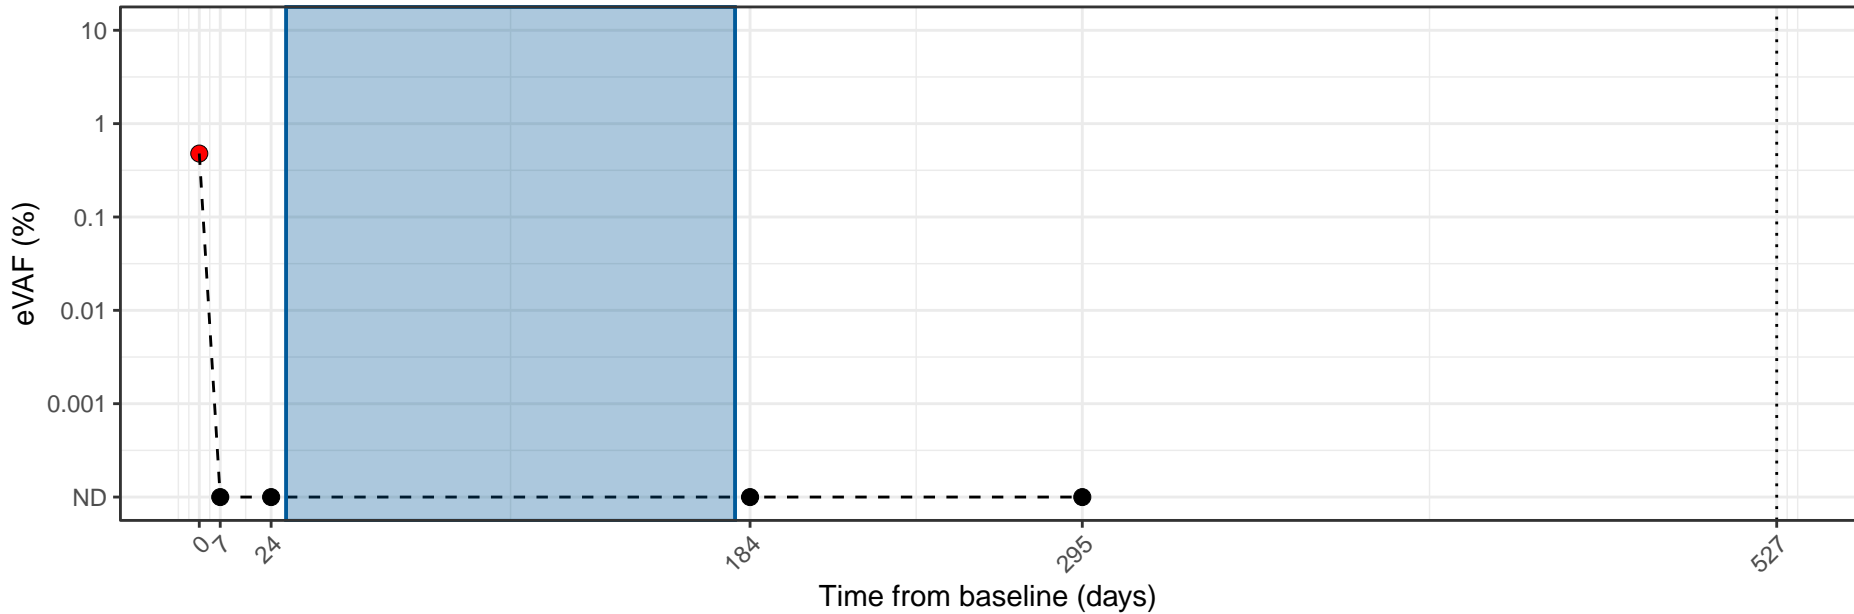

Patient 5

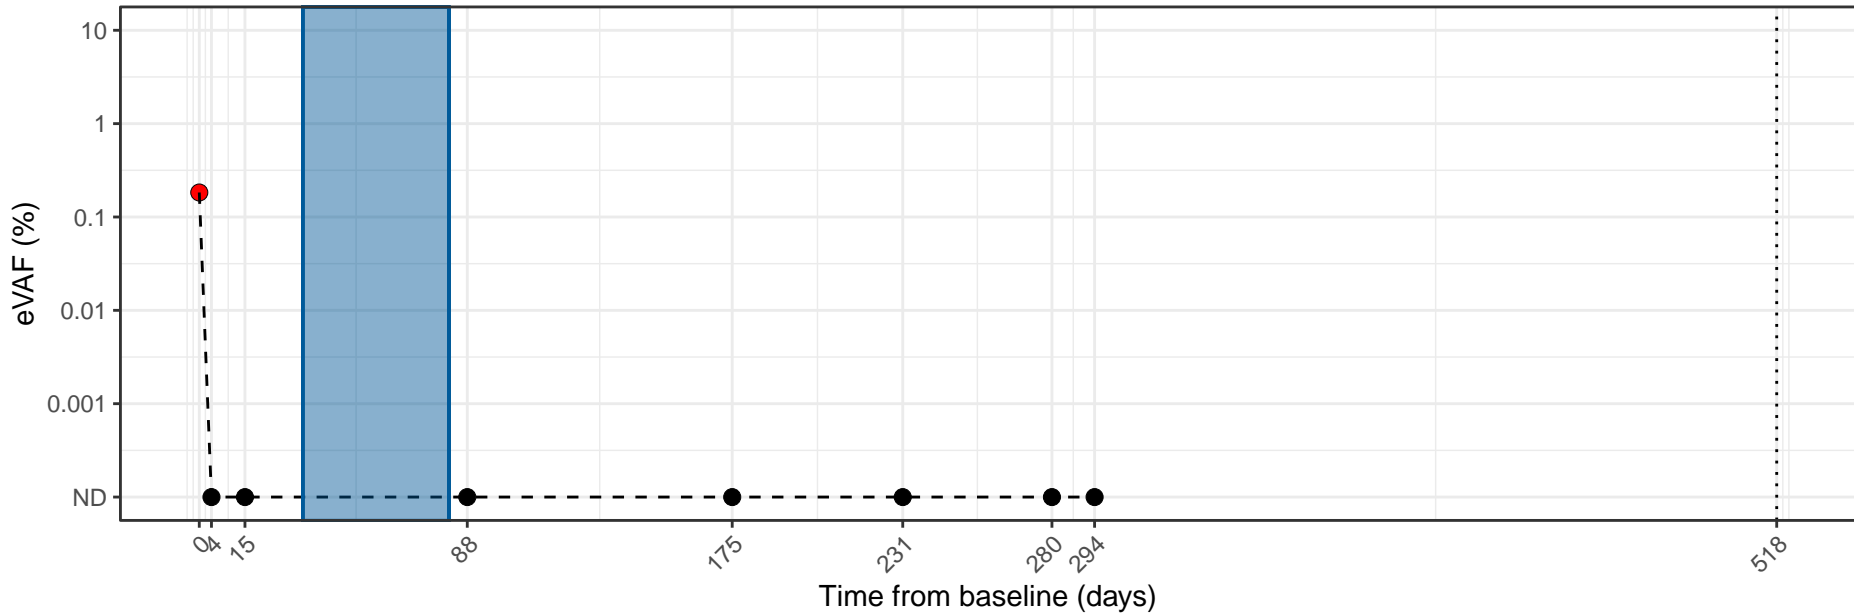

# Patient 1

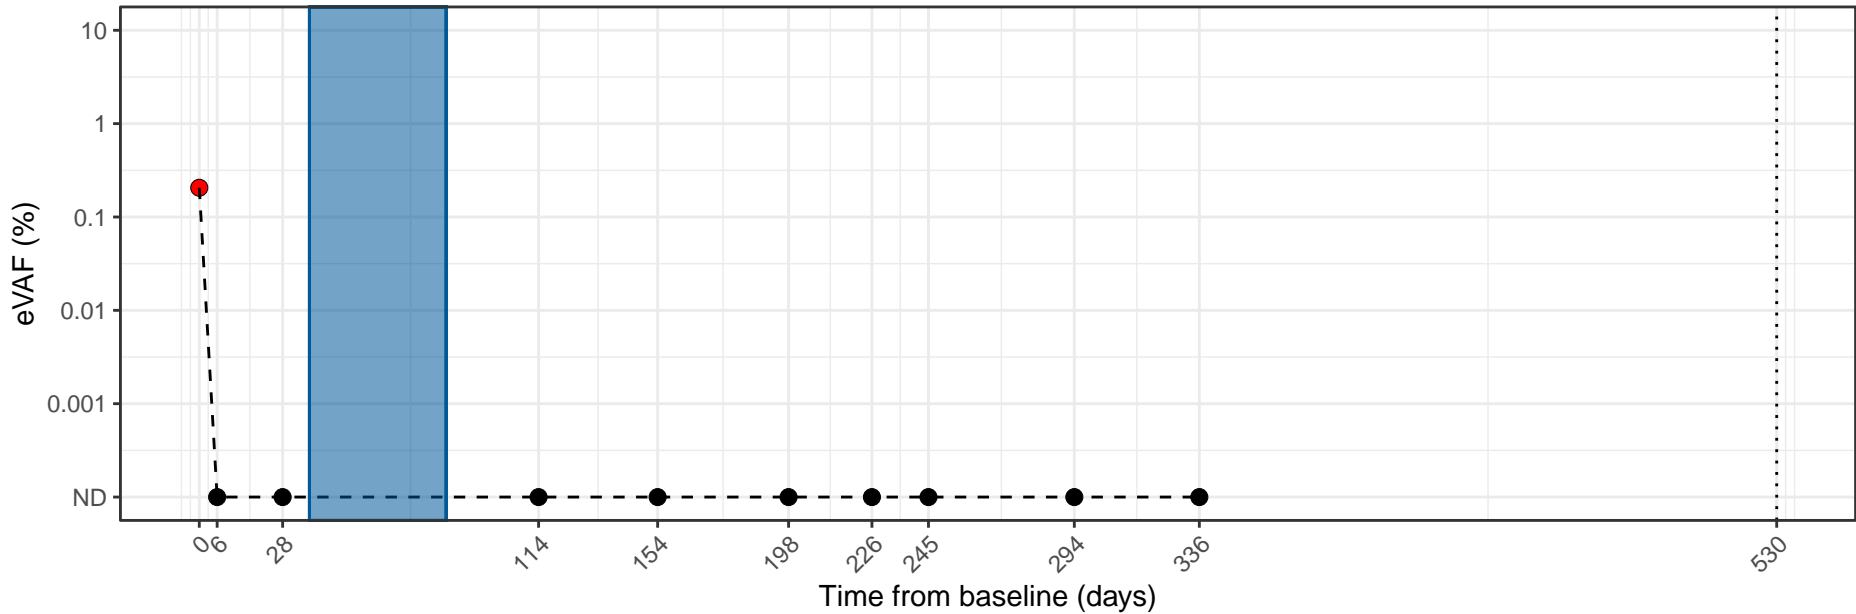

# Patient 11

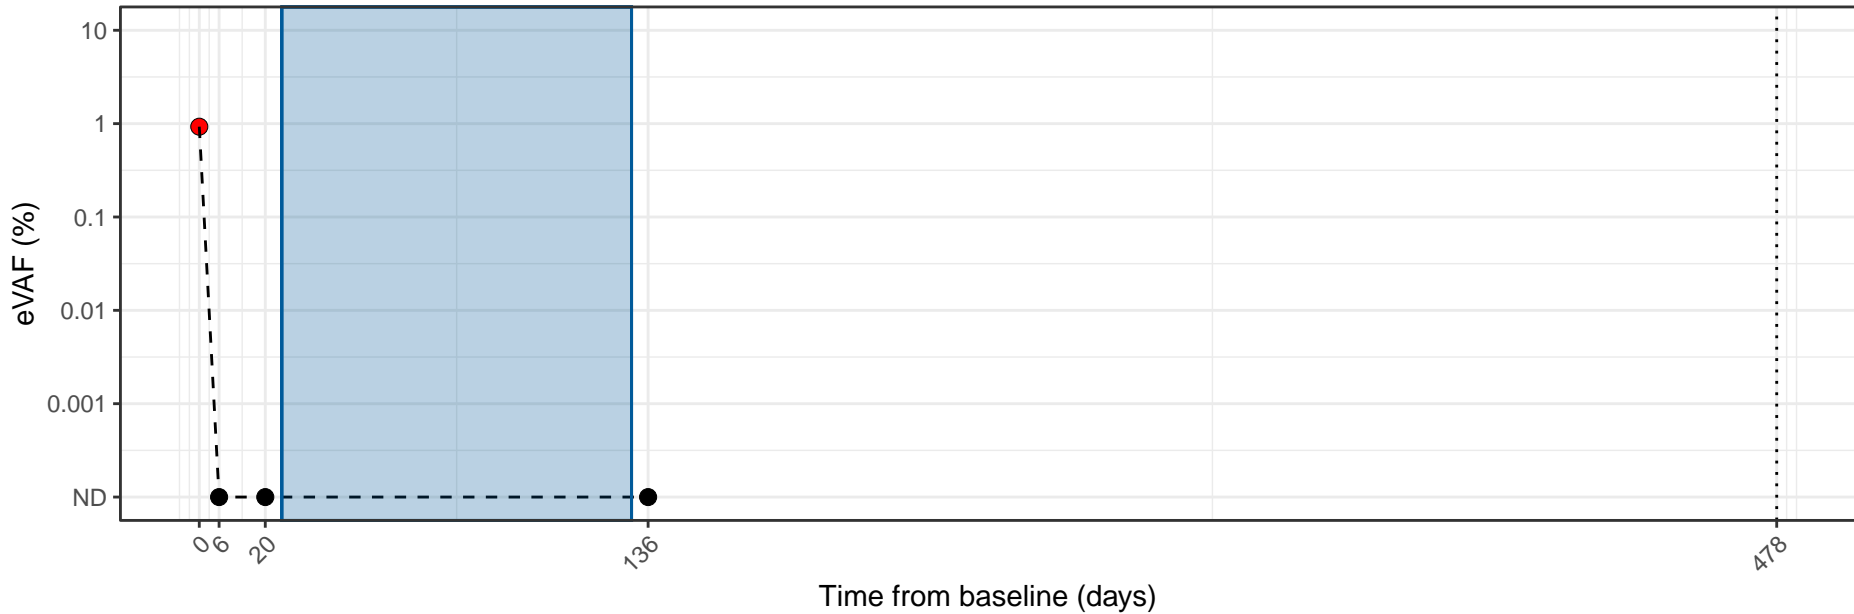

Patient 13

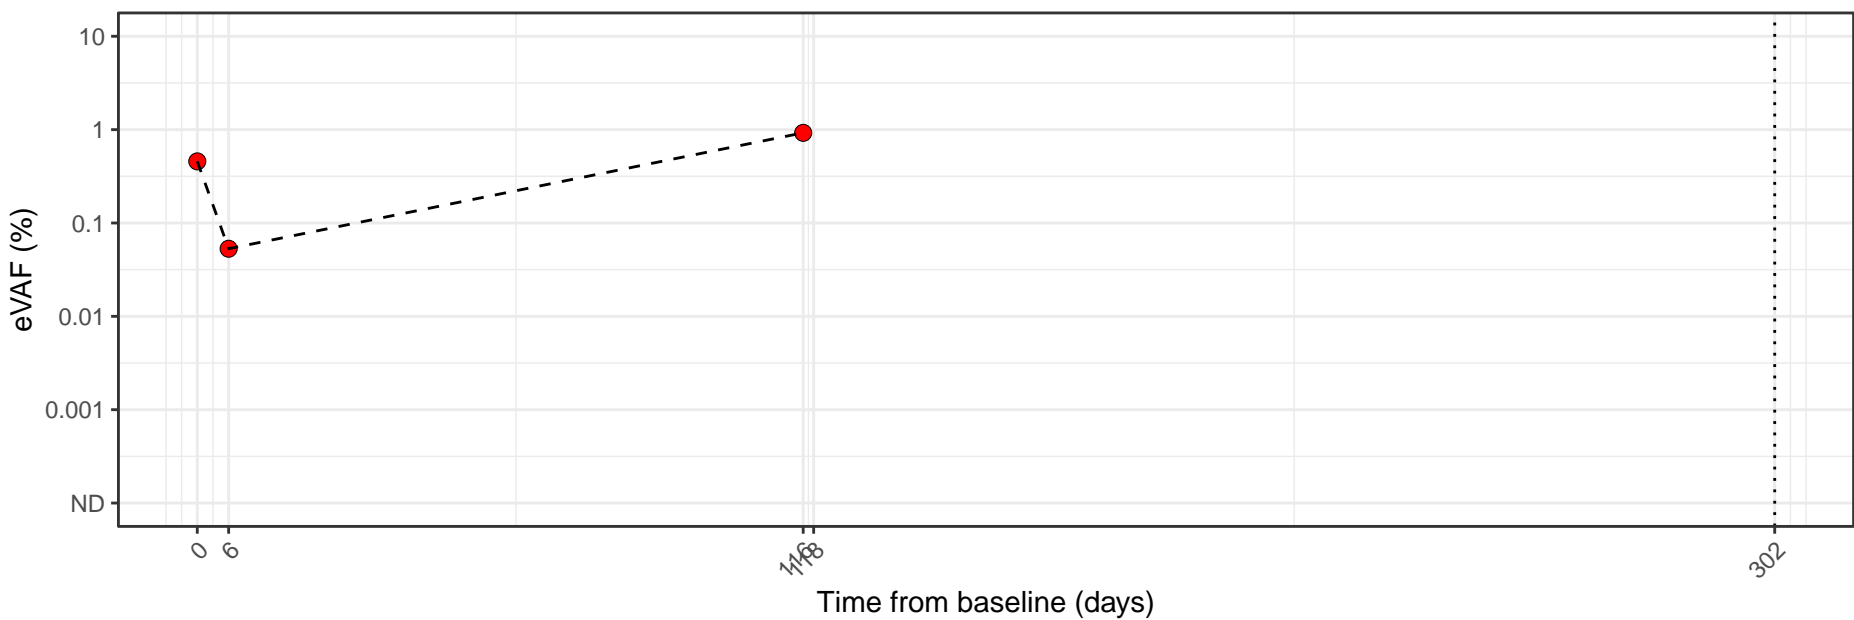

Patient 7

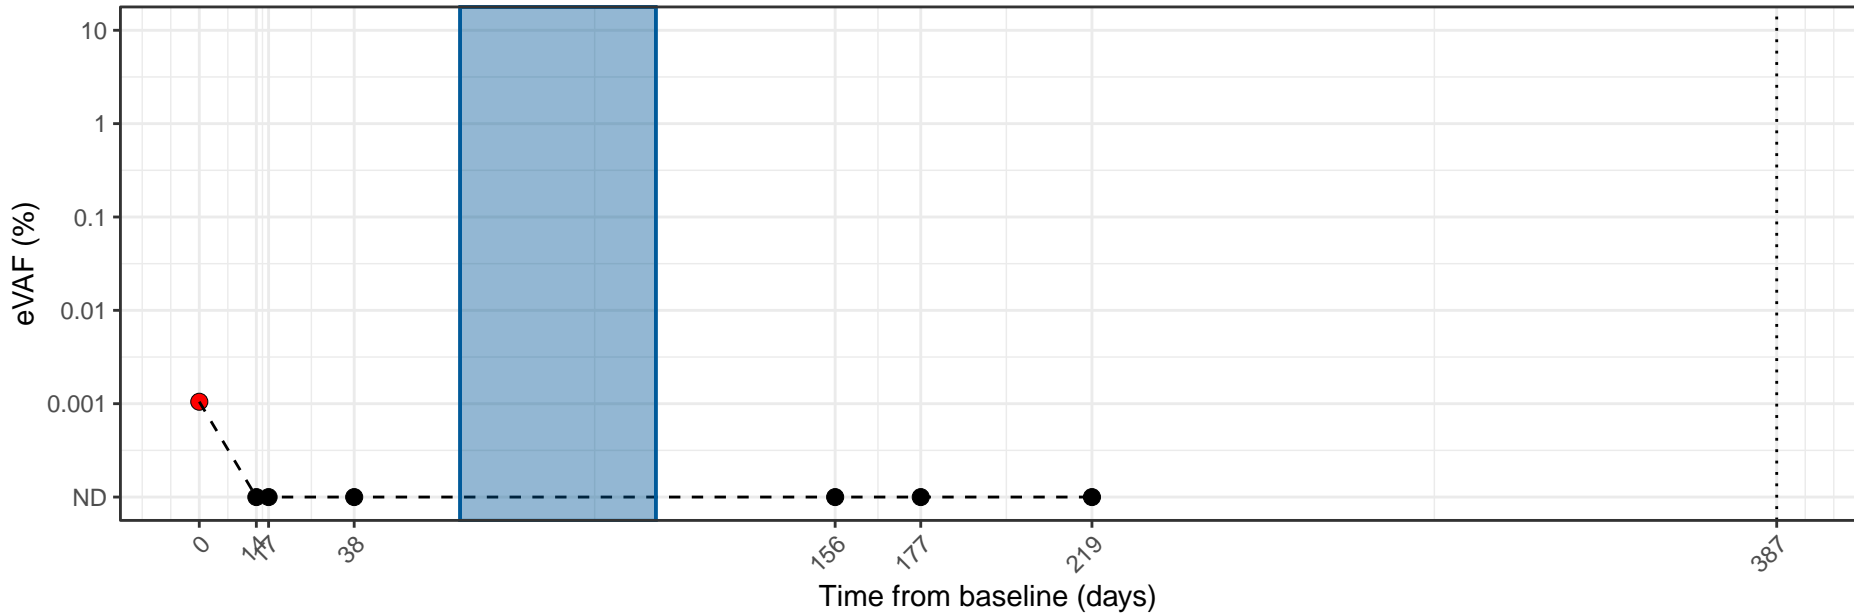



# Patient 12

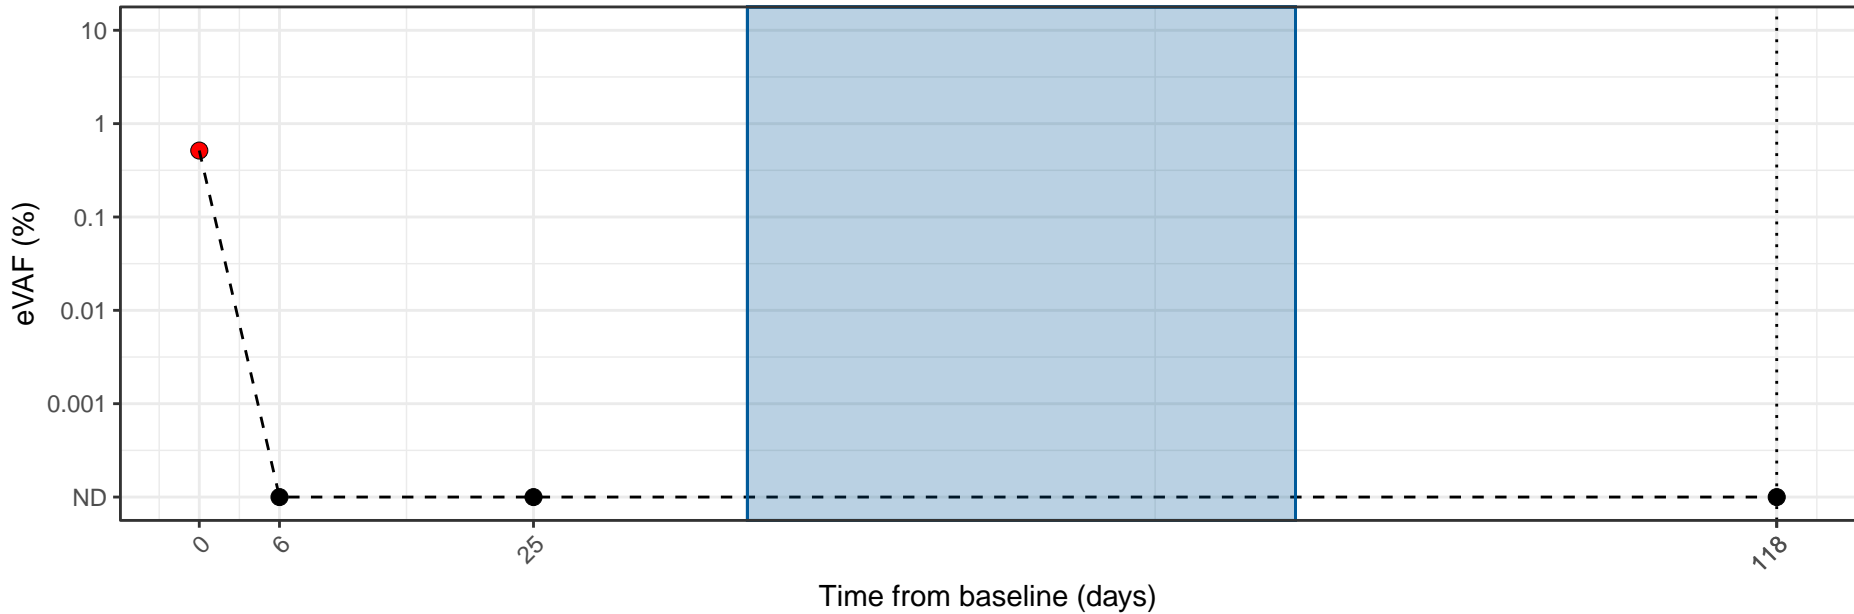

Patient 14

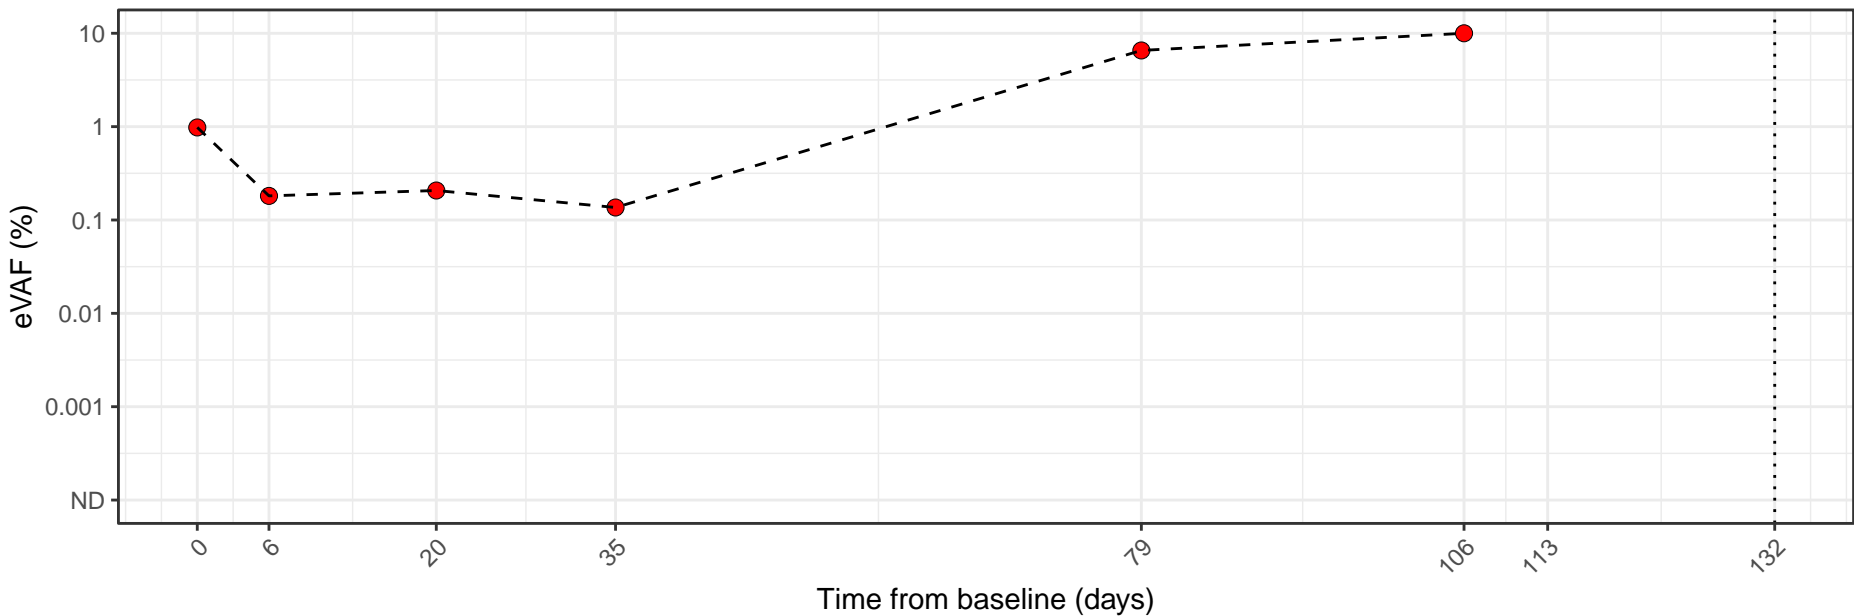

# Patient 14

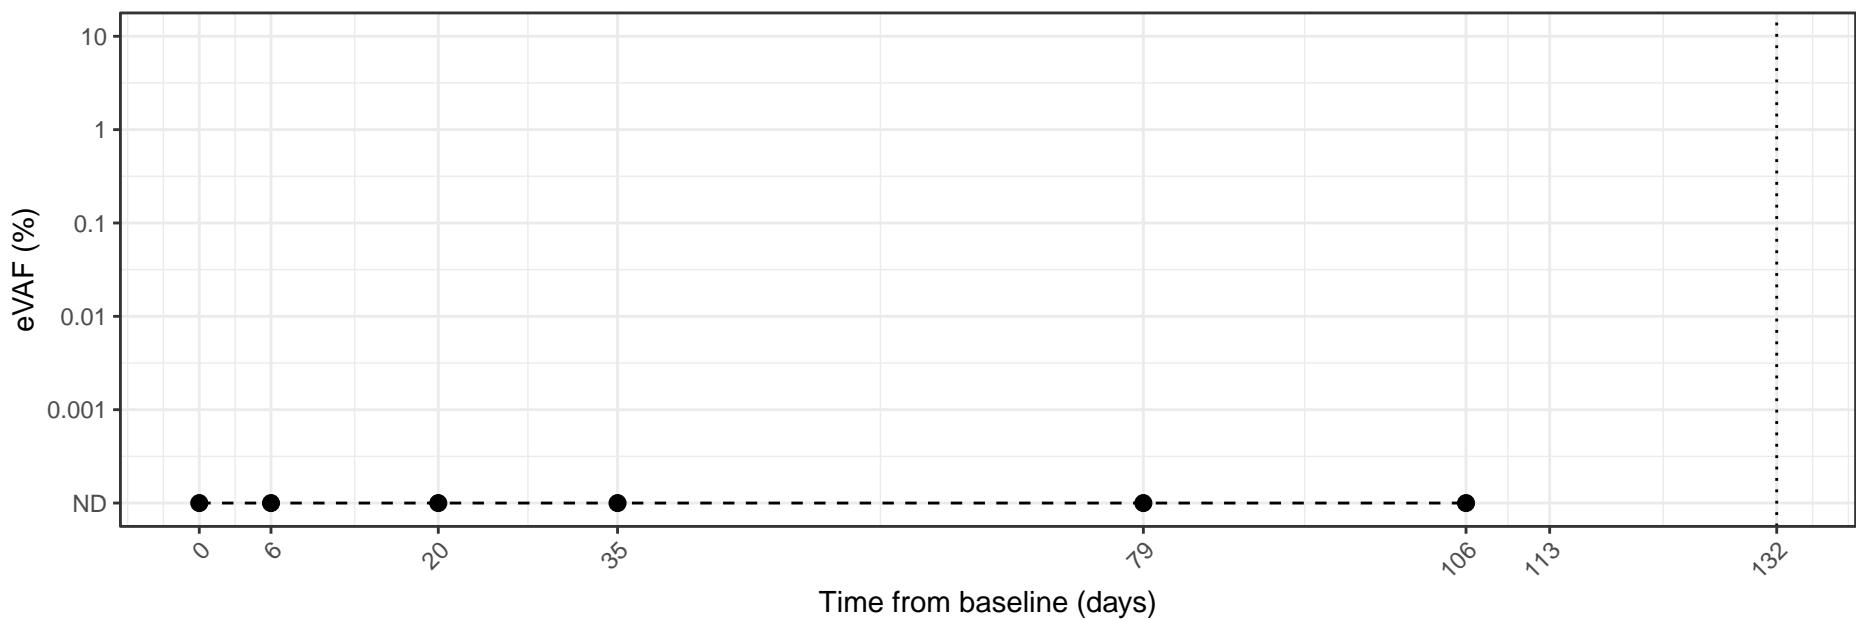

# Patient 17

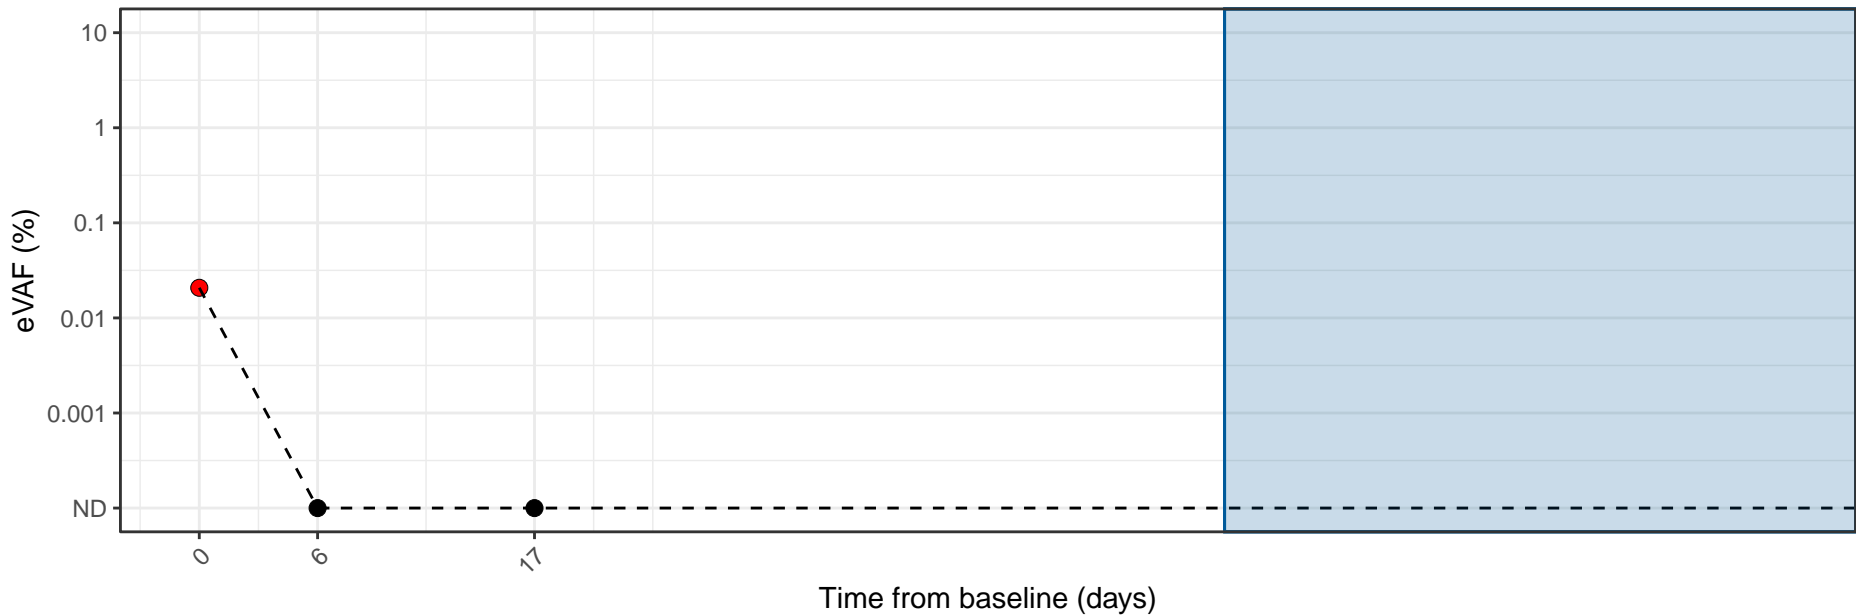

Patient 6

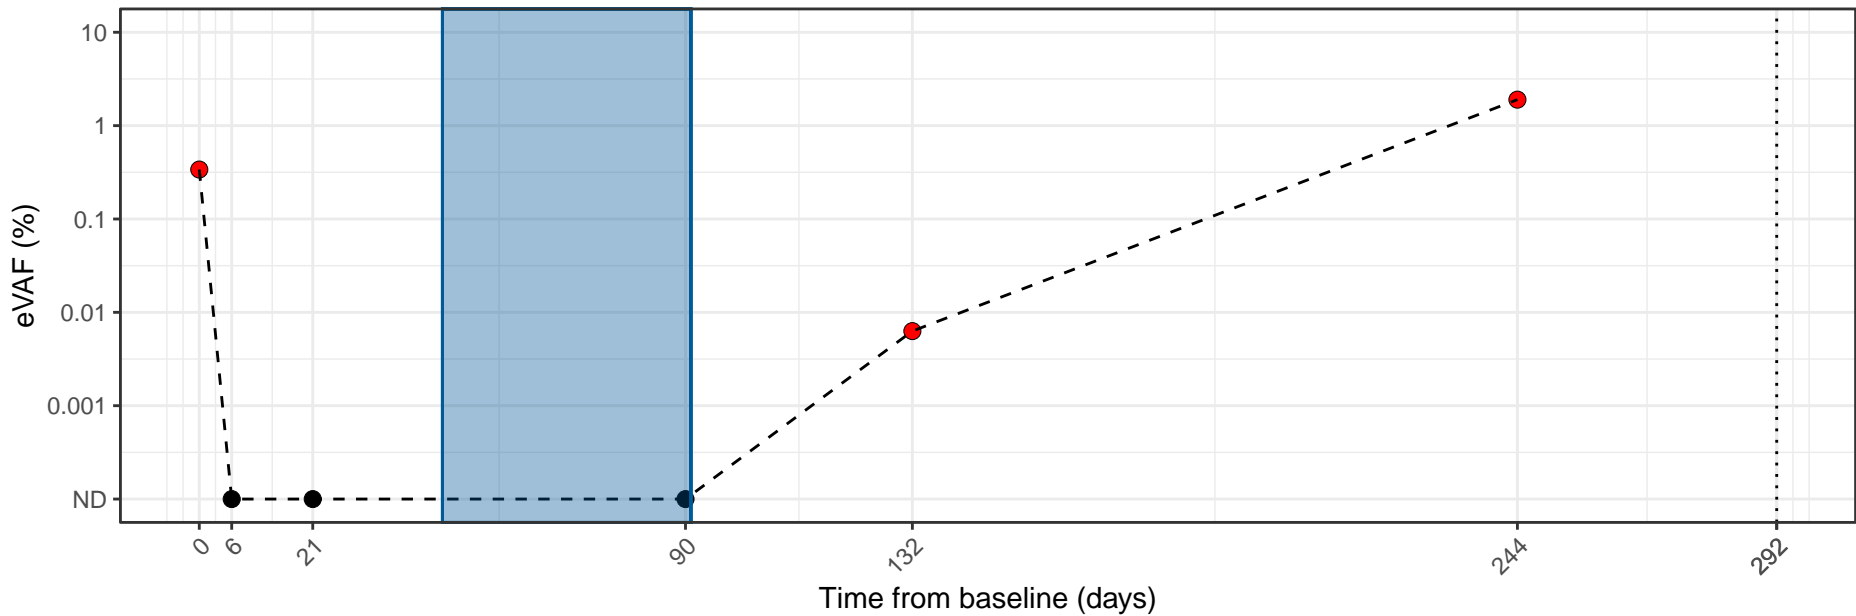

# Patient 16

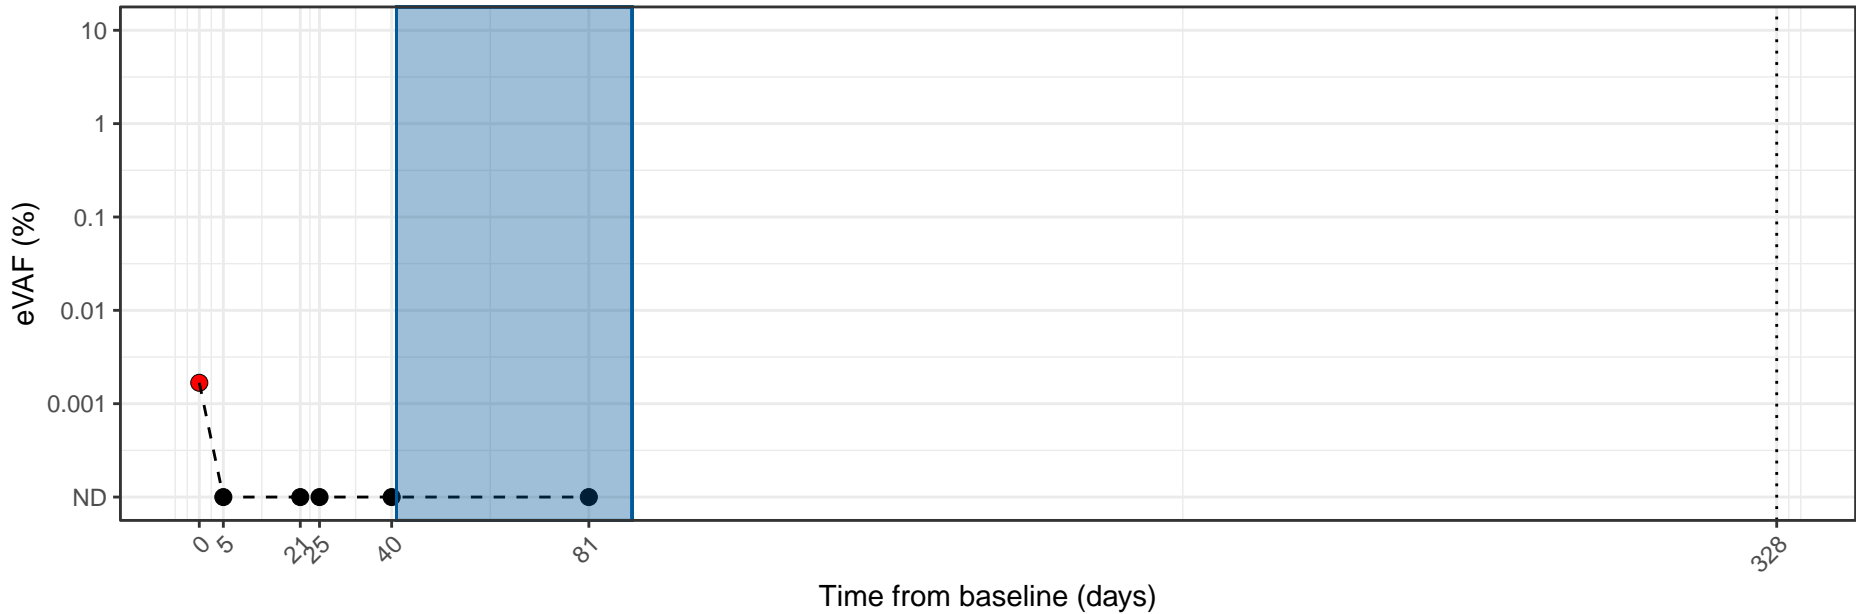

Patient 9

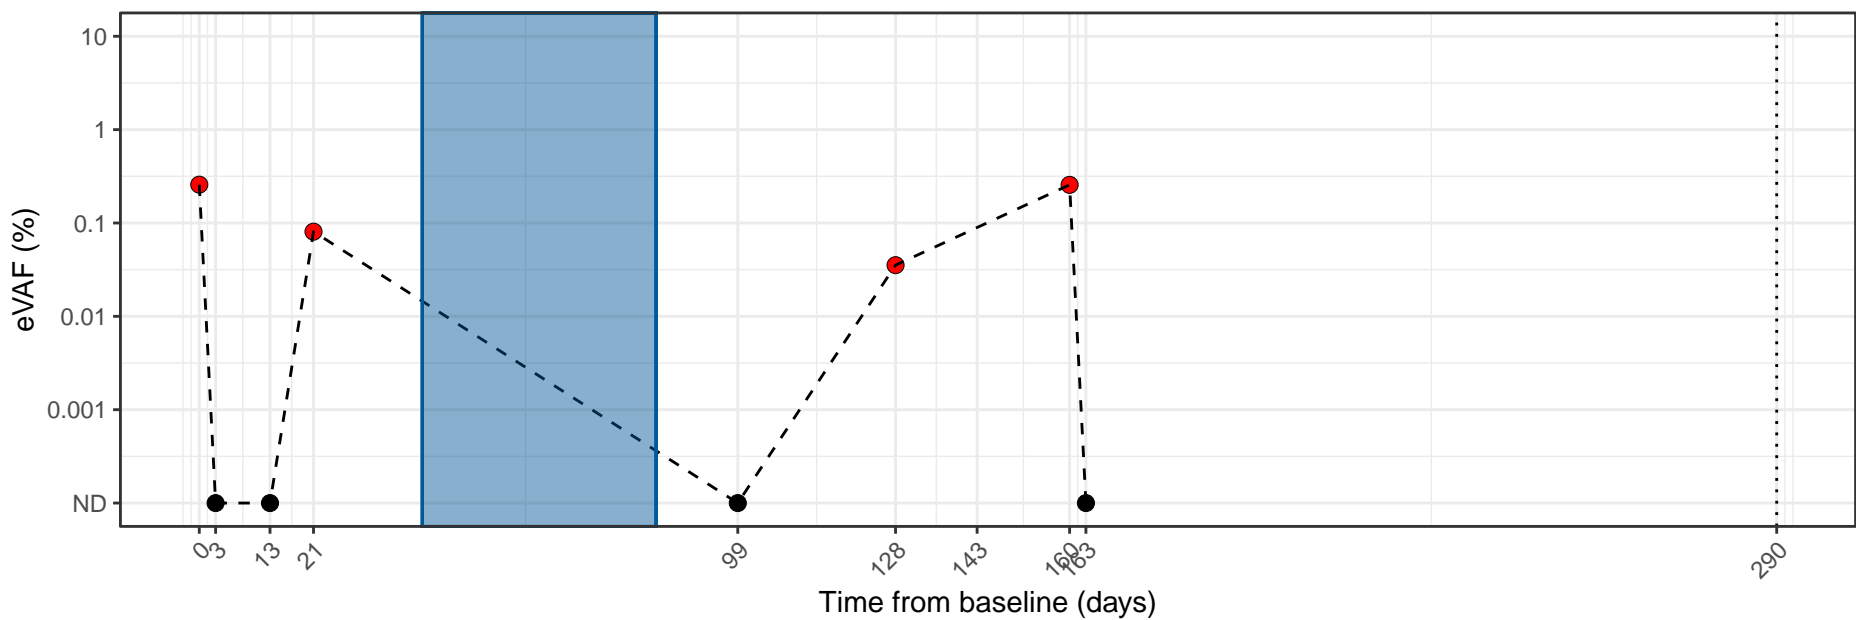

Patient 3

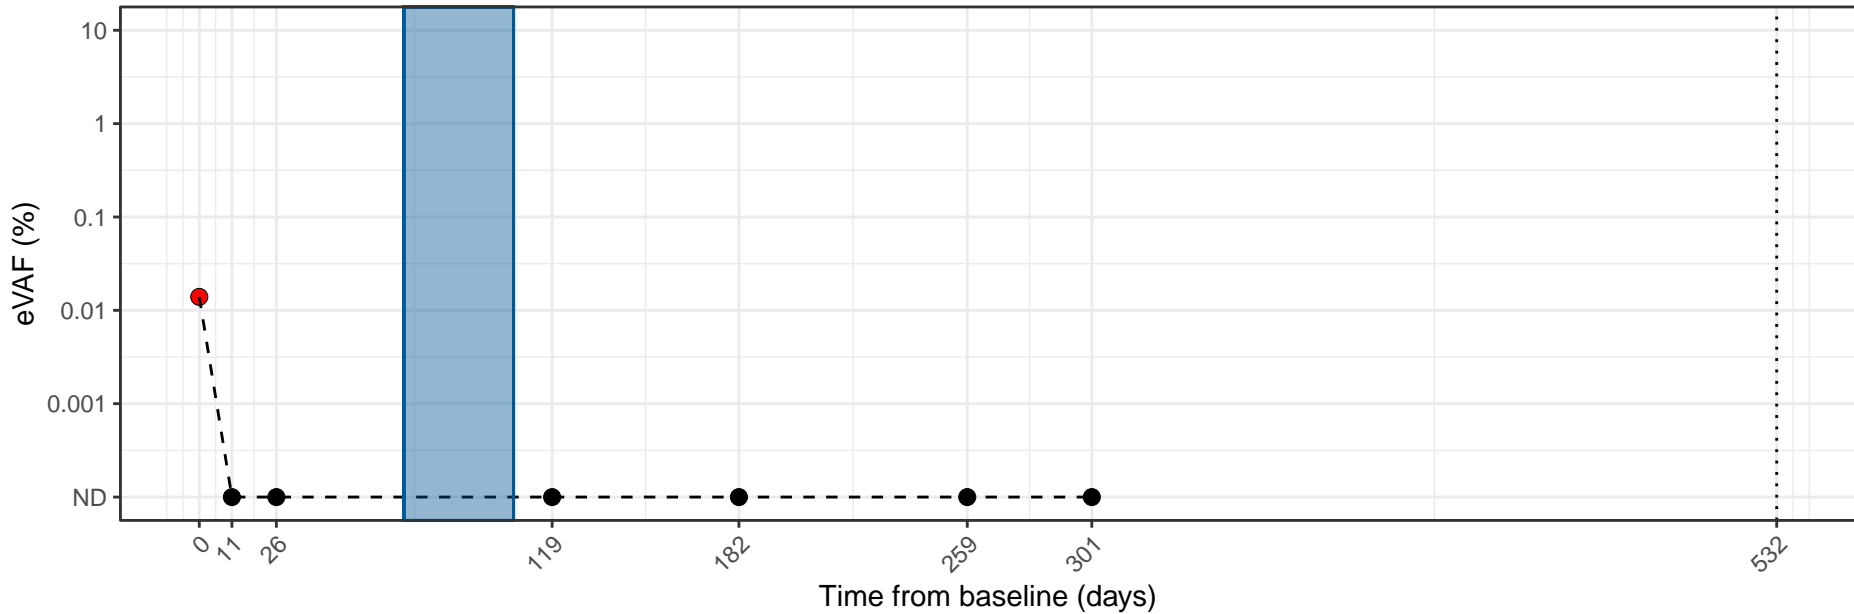



# Patient 8

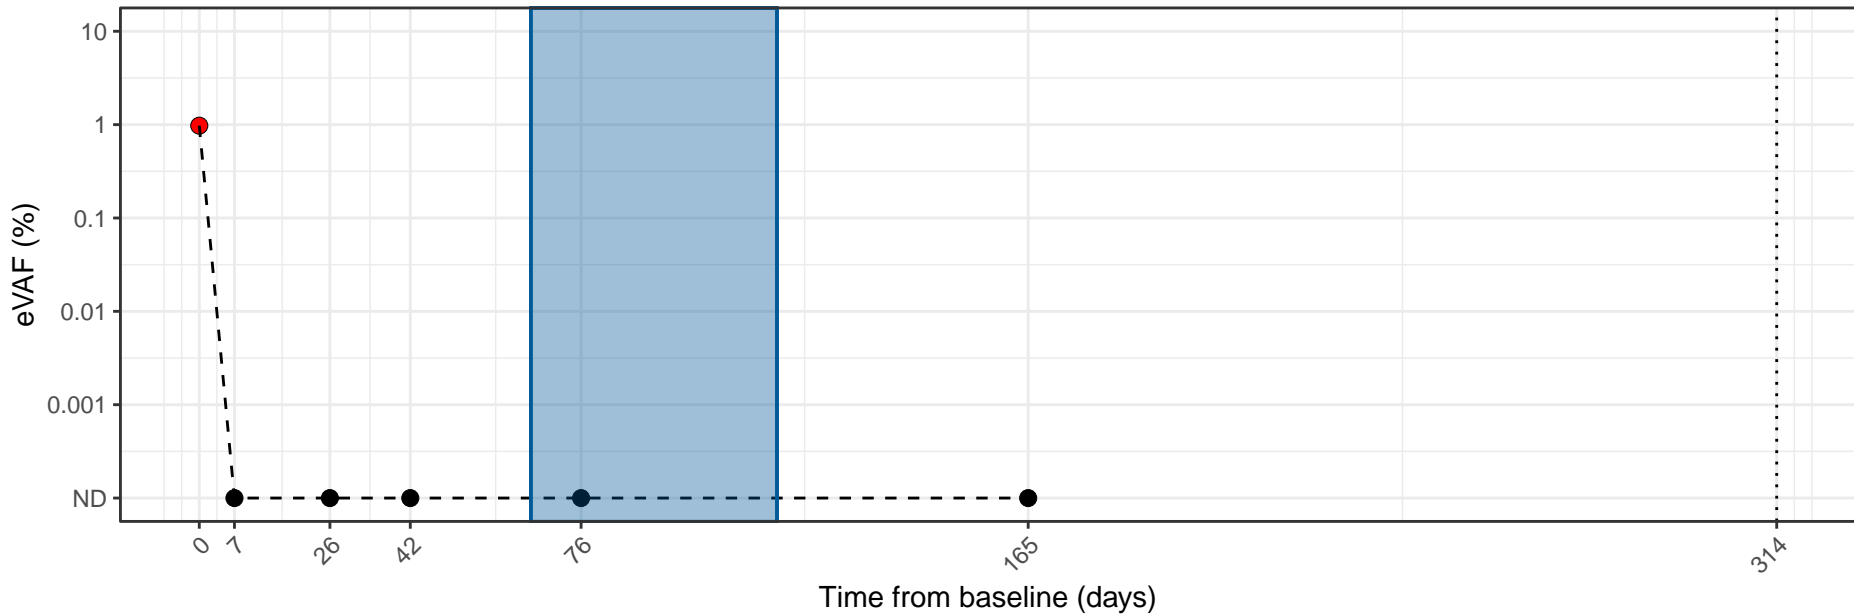

Patient 10

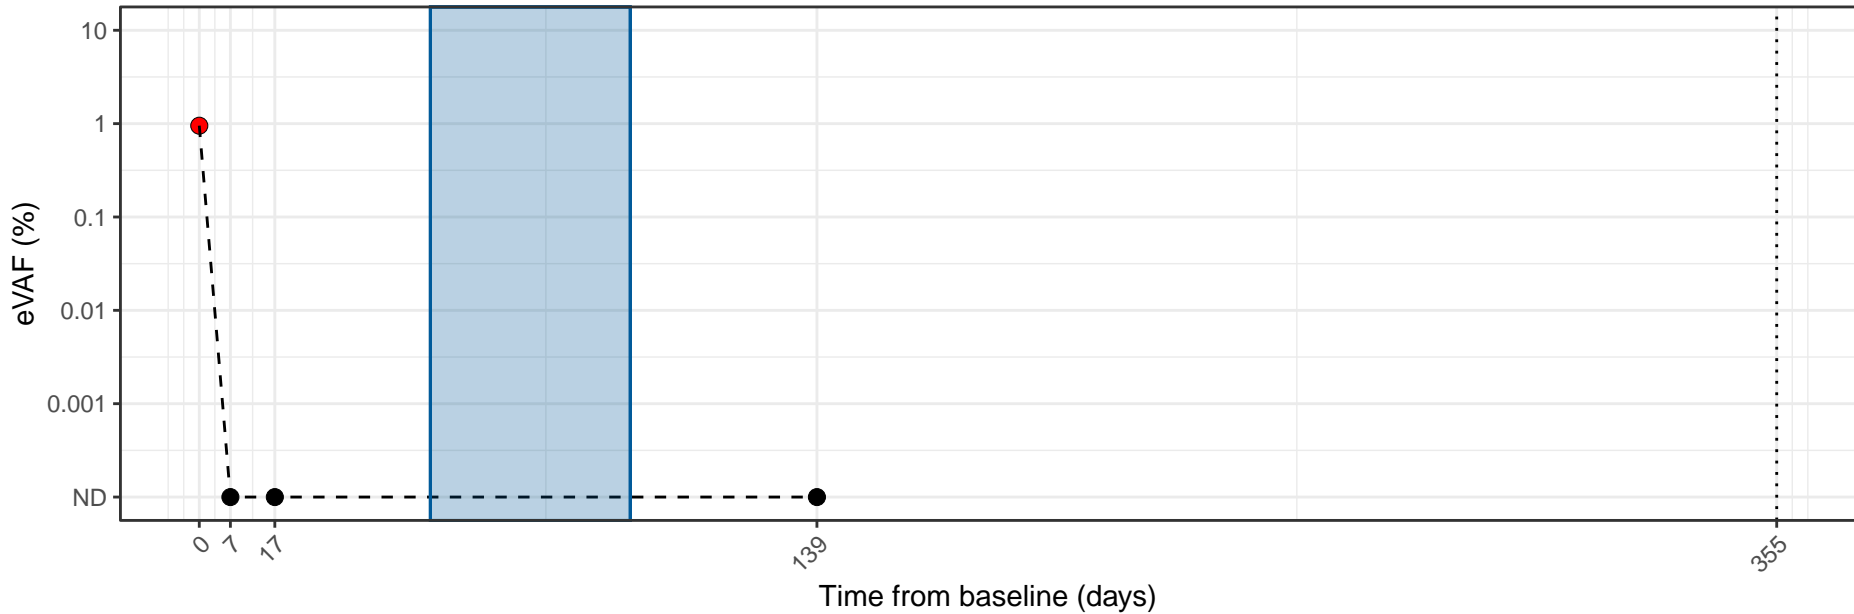

Supplement: 41416_2022_1716_MOESM3_ESM.pdf [file 41416_2022_1716_MOESM3_ESM.pdf]
